# Supplementary material for: Ultra-small RuO2/NHC nanocrystal electrocatalysts with efficient water oxidation activities in acidic media
Source: Royal Society of Chemistry journal article supplement (doi:10.1039/d2dt02781j), 2022-01-01
Supplement: d2dt02781j1.pdf [file d2dt02781j1.pdf]

## **Ultra-small RuO<sub>2</sub>/NHC nanocrystal electrocatalysts with efficient water oxidation activities in acidic media**

Yujie Du<sup>a</sup>, Kaiyang Zhang<sup>a</sup>, Rui Yao<sup>a</sup>, Yun Wu<sup>a</sup>, Qiang Zhao<sup>a</sup>, Jinping Li<sup>a</sup>, Guang Liu<sup>a\*</sup>

Shanxi Key Laboratory of Gas Energy Efficient and Clean Utilization, College of Chemical Engineering and Technology, Taiyuan University of Technology, Taiyuan, Shanxi 030024, PR China.

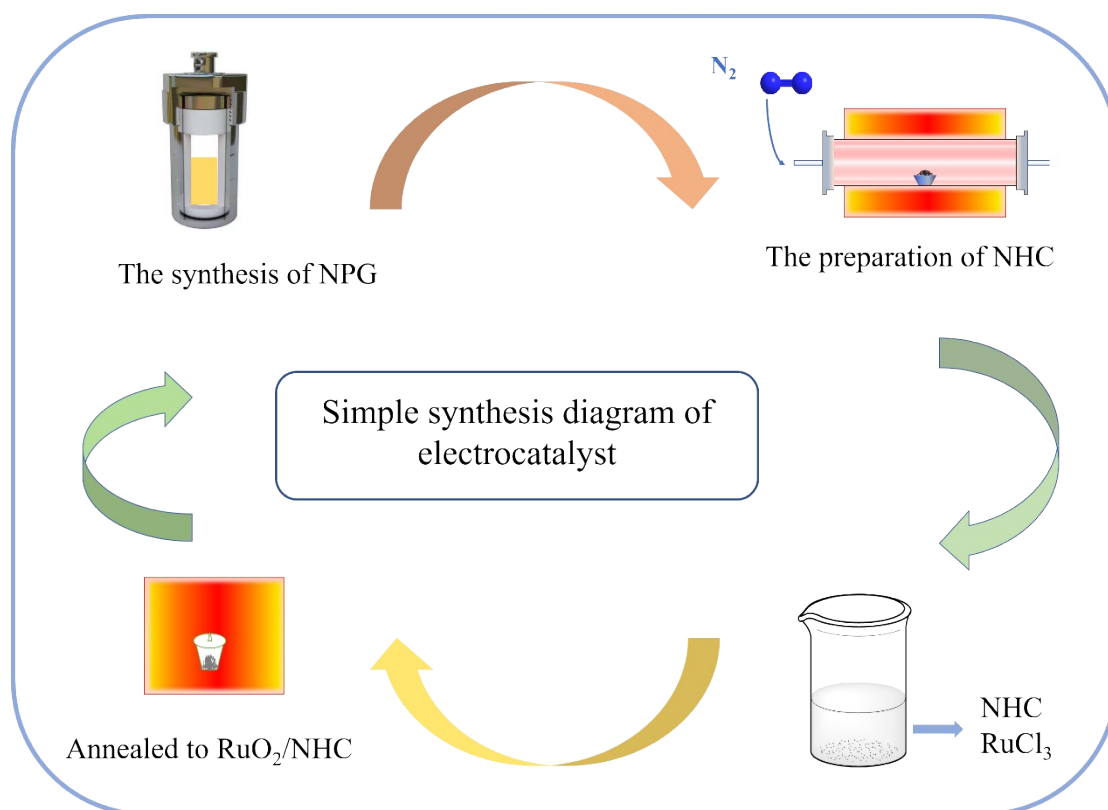

Fig S1. Simple synthesis flow diagram of electrocatalyst  $\text{RuO}_2/\text{NHC}$ .

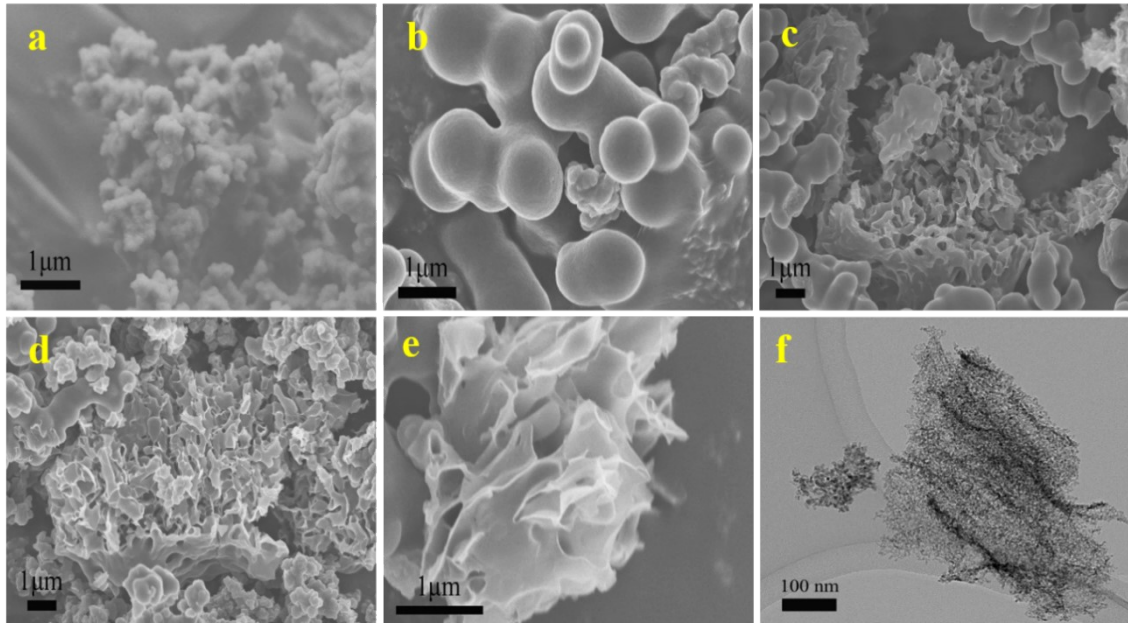

Fig S2. SEM of a) NPG; b) NHC<sup>0</sup>; c) NHC<sup>1</sup>; d) NHC<sup>2</sup>; e) NHC<sup>4</sup> and f) TEM of RuO<sub>2</sub>/NHC<sup>3</sup>.

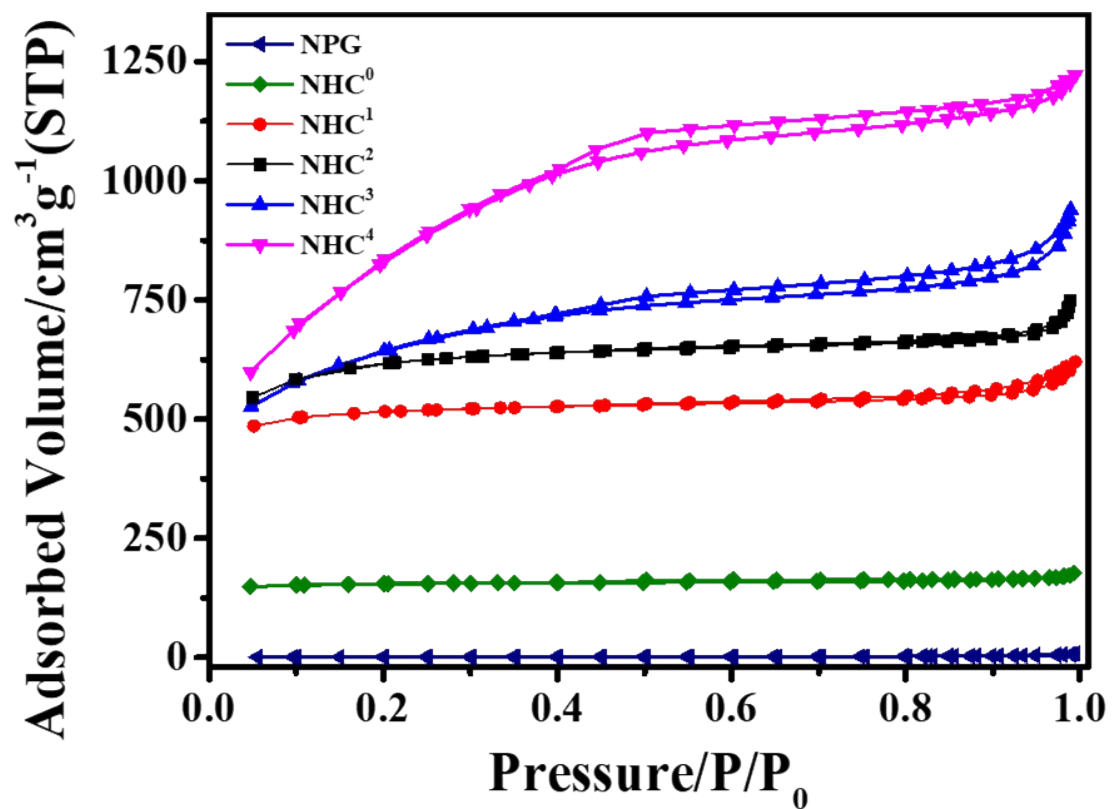

Fig S3. Nitrogen adsorption-desorption isotherms of different supporter samples.

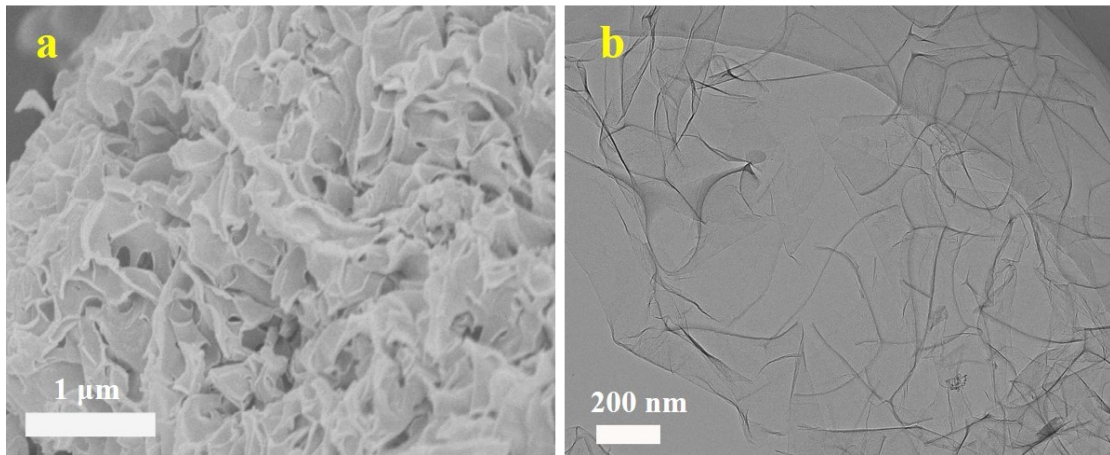

Fig S4. a) SEM of NHC<sup>3</sup> and b) TEM image of NHC<sup>3</sup>.

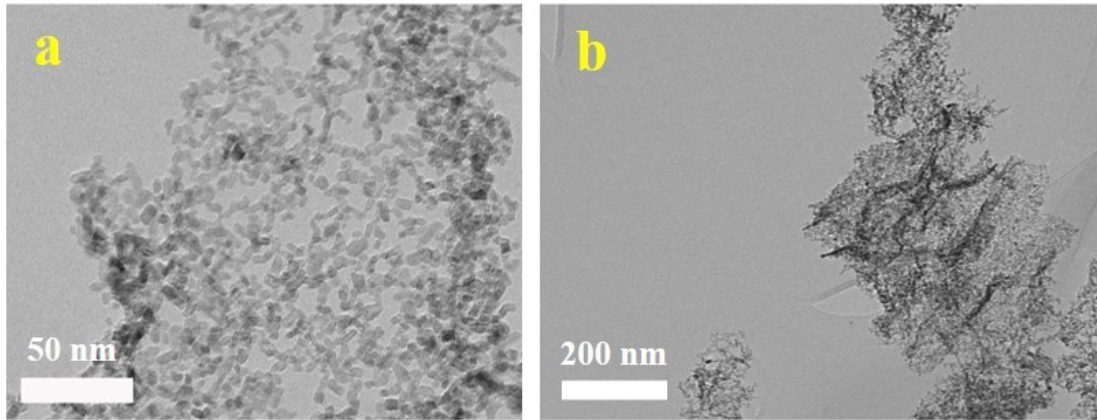

Fig S5. TEM of  $\text{RuO}_2/\text{NHC}^3$  at different multiples.

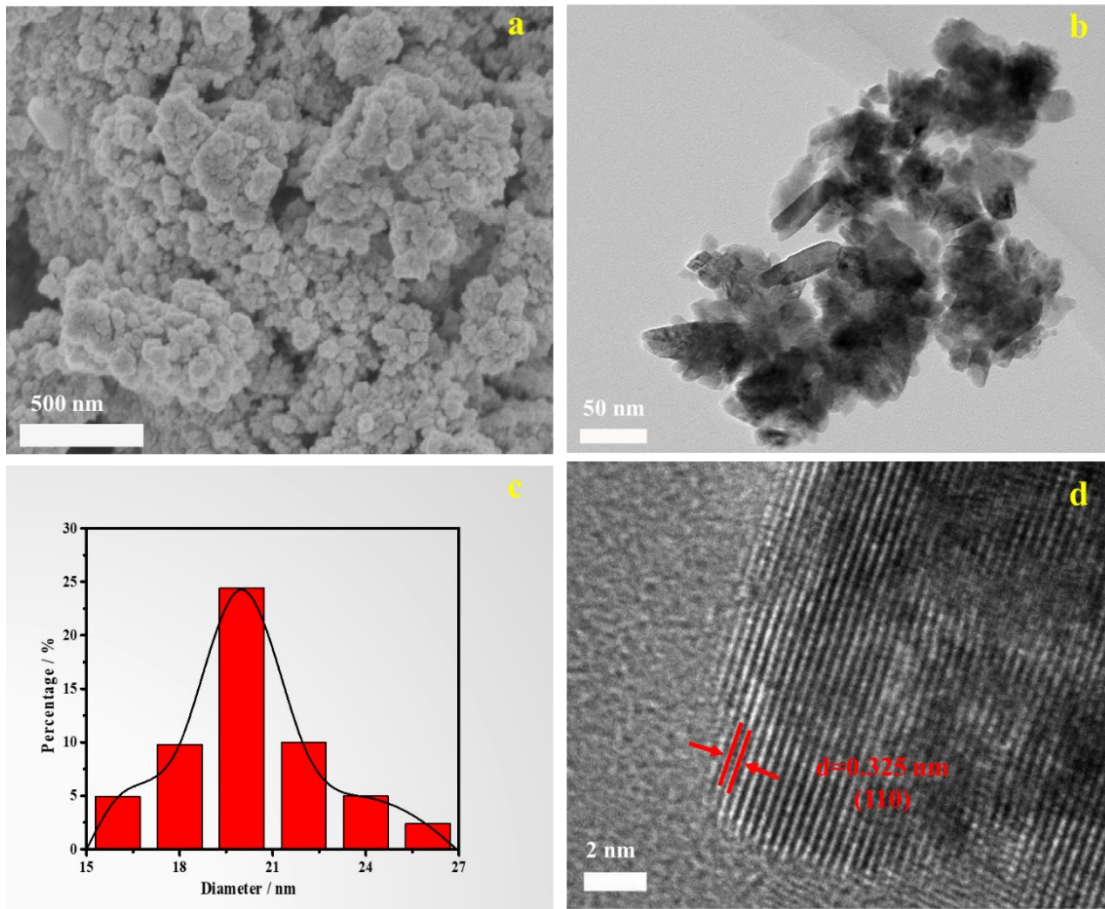

Fig S6. a) SEM of RuO<sub>2</sub>; b) TEM image of RuO<sub>2</sub>; c) particle size image of RuO<sub>2</sub> and d) HR-TEM image of RuO<sub>2</sub>.

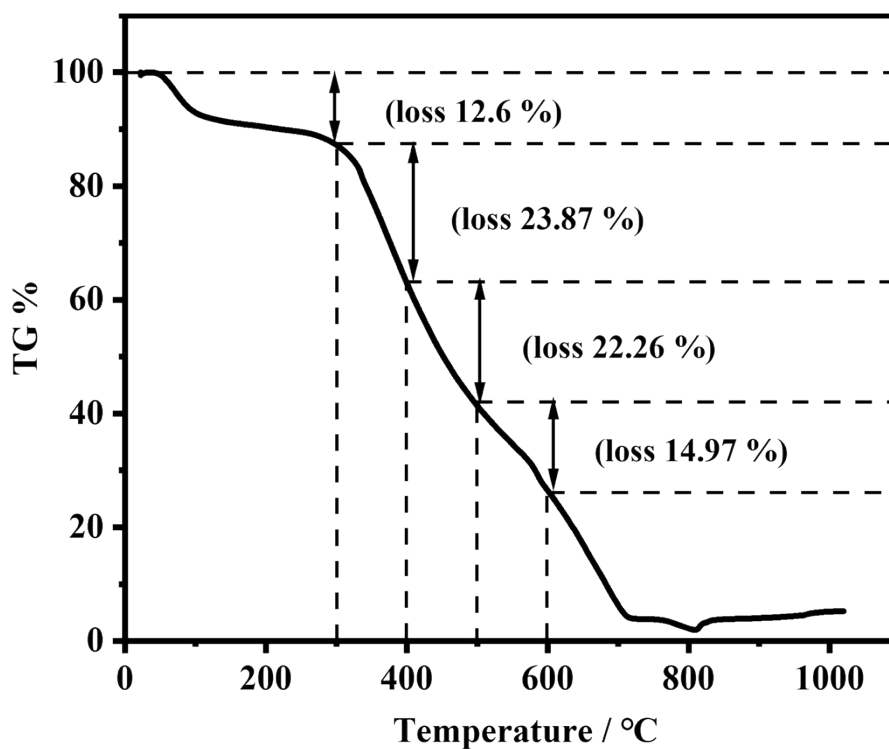

Fig S7. TGA plot of precursor of RuO<sub>2</sub>/NHC in 20 mL/min air atmosphere with temperature ramping 10 °C/min.



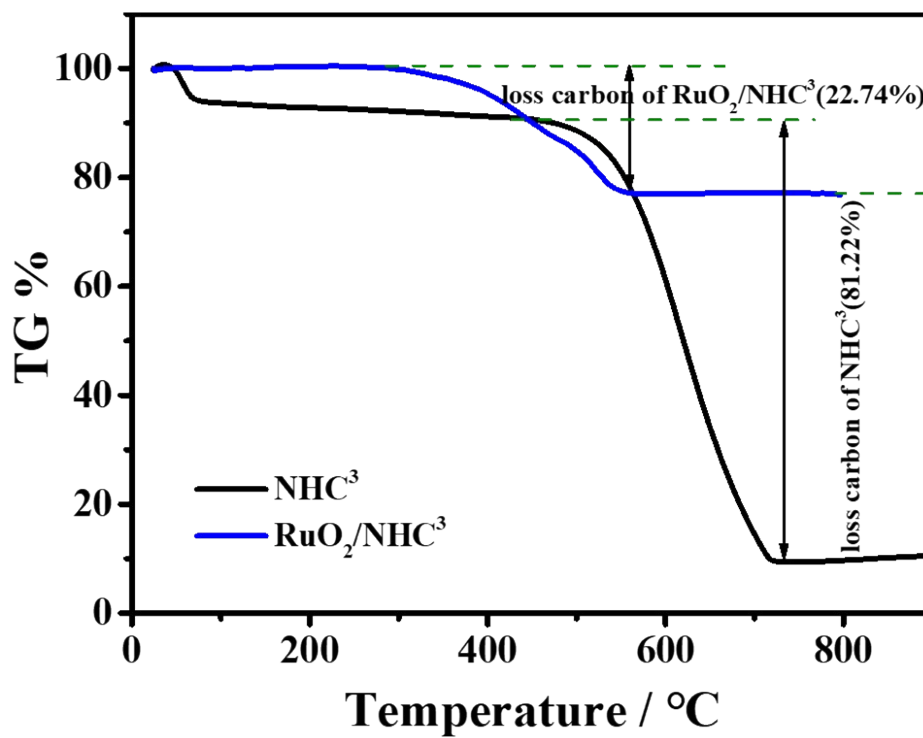

Fig S8. TGA plot of RuO<sub>2</sub>/NHC<sup>3</sup> and NHC<sup>3</sup> in 20 mL/min air atmosphere with temperature ramping 10 °C/min.

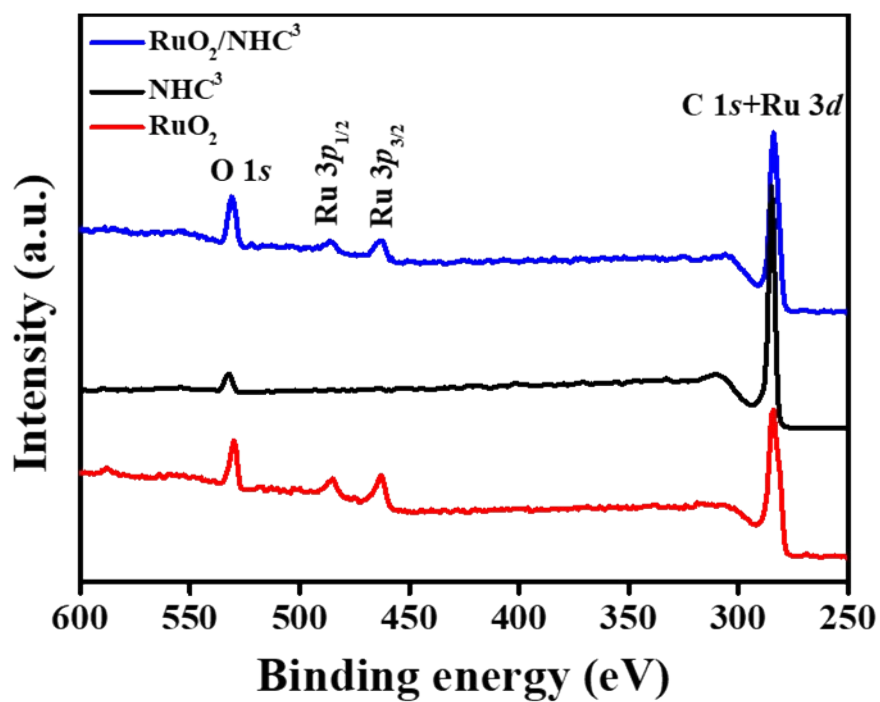

Fig S9. XPS survey spectra of NHC<sup>3</sup>, RuO<sub>2</sub>/NHC<sup>3</sup> and RuO<sub>2</sub> electrocatalysts.

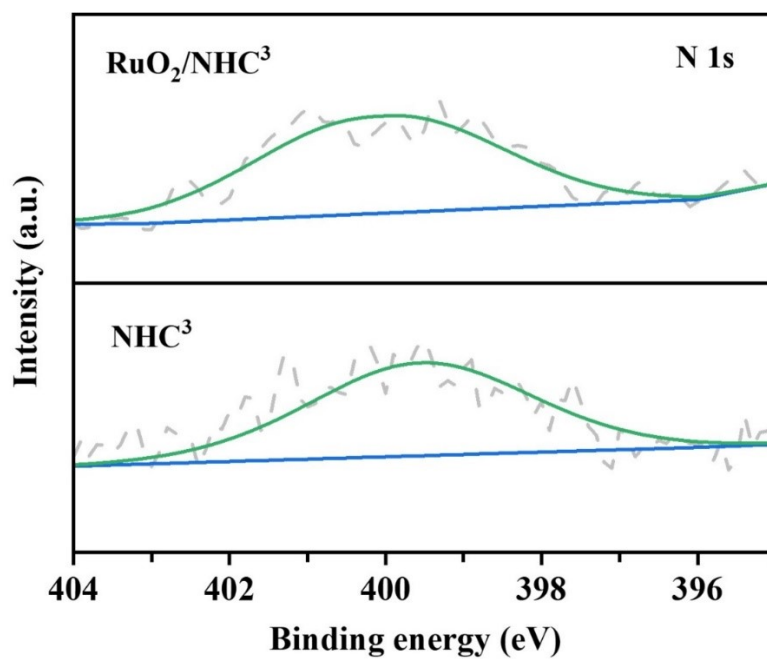

Fig S10. High resolution XPS spectra of N 1s of electrocatalysts RuO<sub>2</sub>/NHC<sup>3</sup> and NHC<sup>3</sup>.

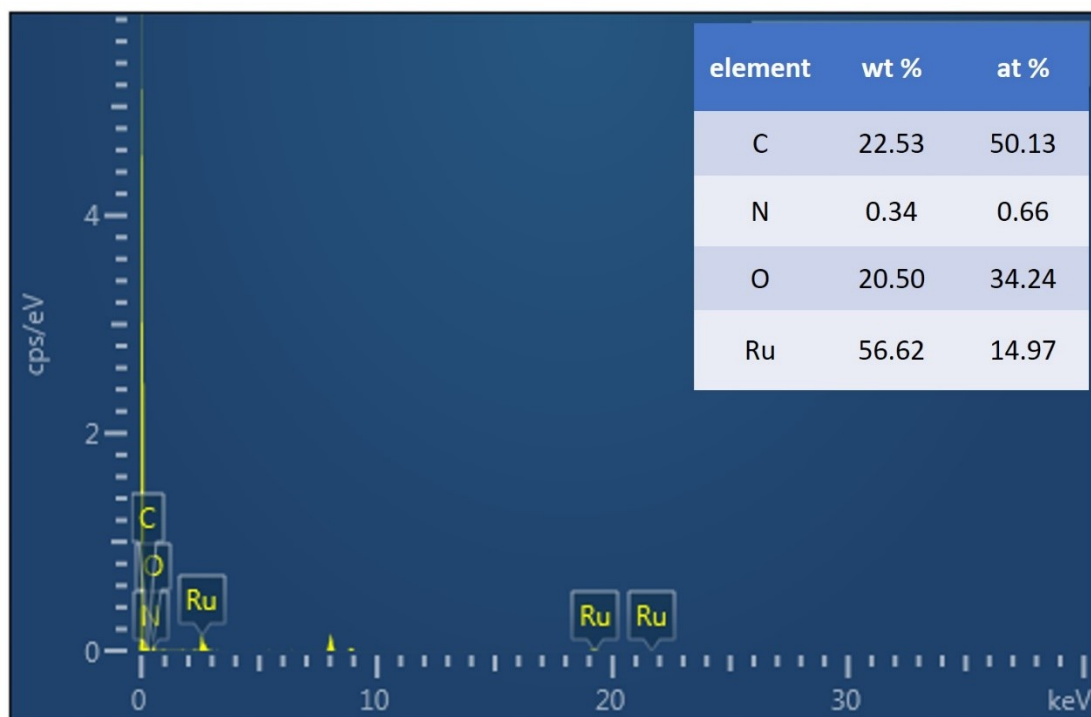

Fig S11. EDS analysis for RuO<sub>2</sub>/NHC<sup>3</sup>.

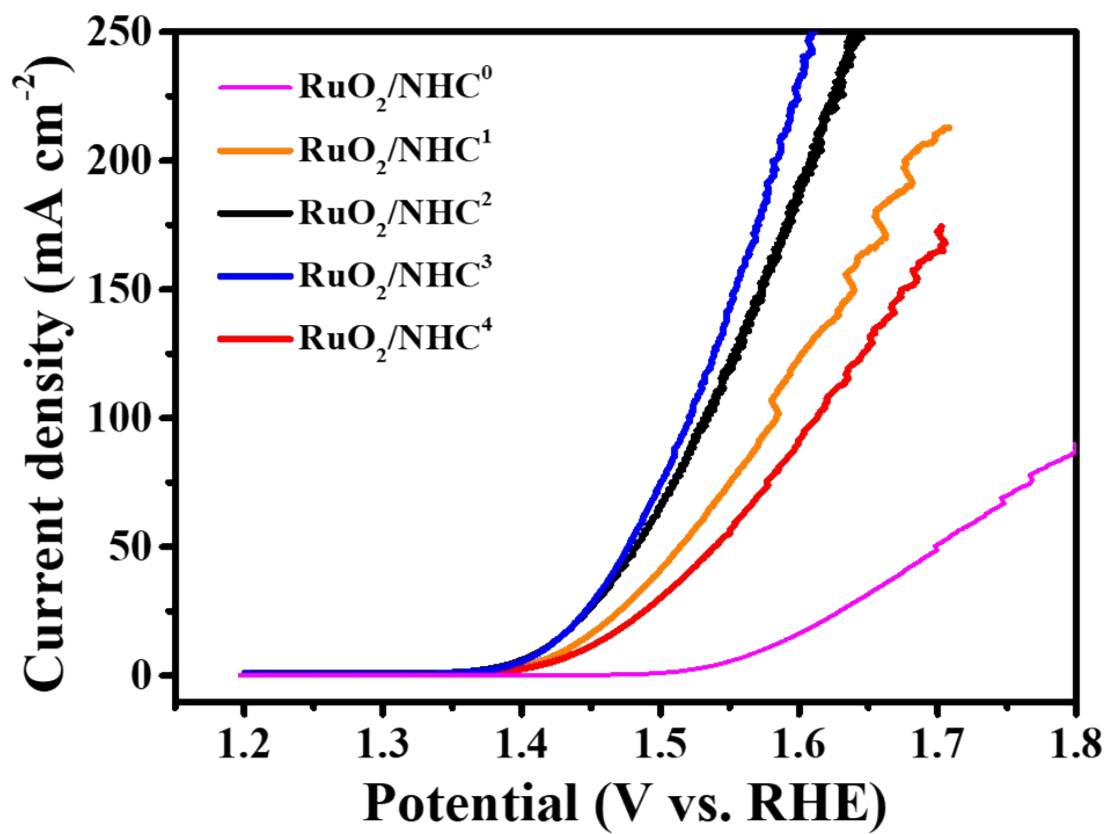

Fig S12. Polarization curves of RuO<sub>2</sub>/NHC<sup>0</sup>, RuO<sub>2</sub>/NHC<sup>1</sup>, RuO<sub>2</sub>/NHC<sup>2</sup>, RuO<sub>2</sub>/NHC<sup>3</sup>, RuO<sub>2</sub>/NHC<sup>4</sup> in 0.5 M H<sub>2</sub>SO<sub>4</sub>.

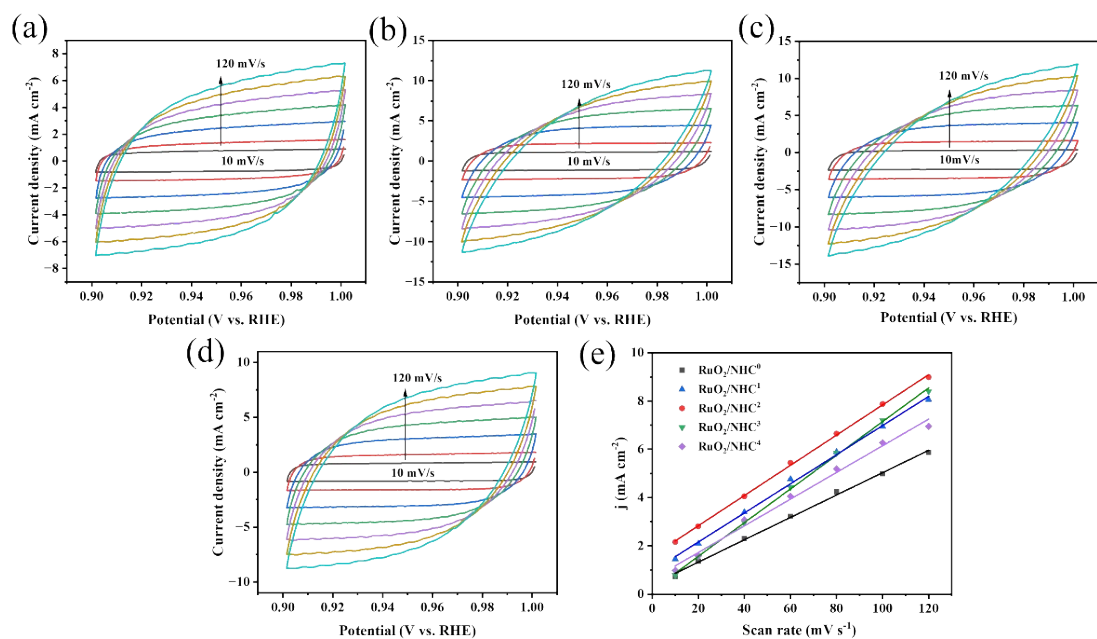

Fig S13. CV curves of a) RuO<sub>2</sub>/NHC<sup>0</sup>, b) RuO<sub>2</sub>/NHC<sup>1</sup>, c) RuO<sub>2</sub>/NHC<sup>2</sup> and d) RuO<sub>2</sub>/NHC<sup>4</sup> e) Current density as a function of the scan rate for different samples for OER.

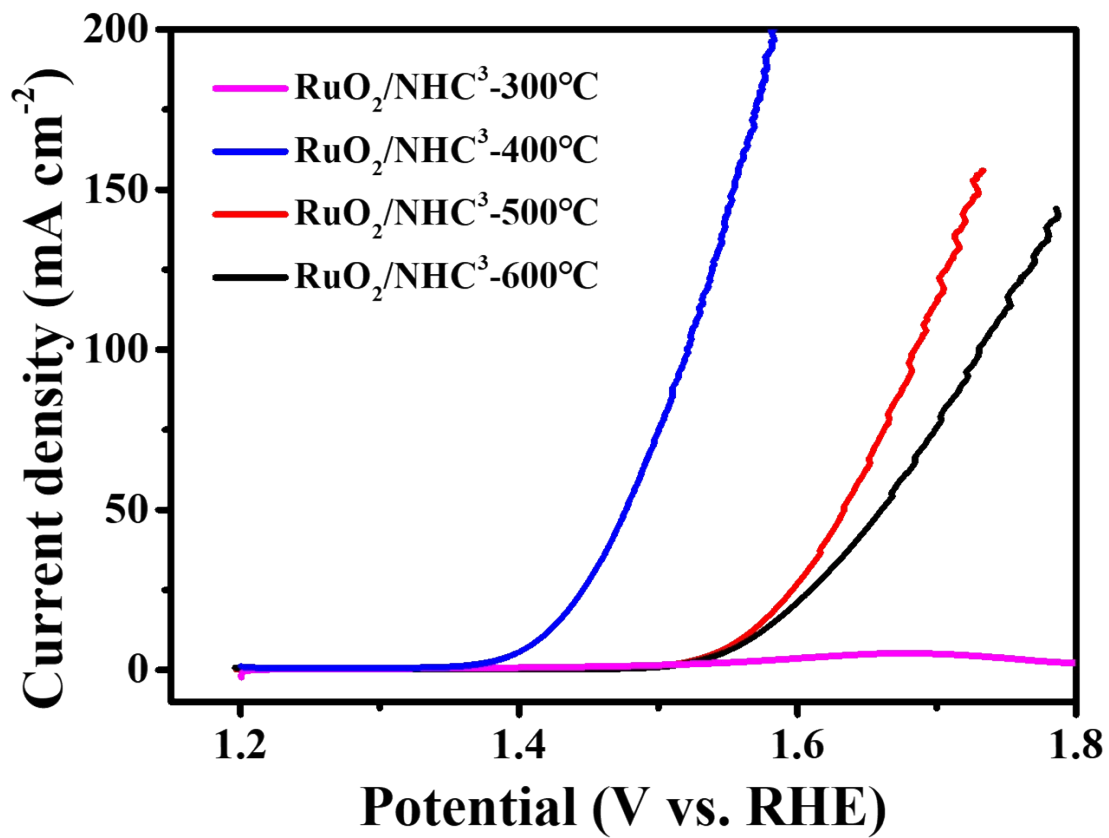

Fig S14. Polarization curves of RuO<sub>2</sub>/NHC<sup>3</sup>-300 °C, RuO<sub>2</sub>/NHC<sup>3</sup>-400 °C, RuO<sub>2</sub>/NHC<sup>3</sup>-500 °C, RuO<sub>2</sub>/NHC<sup>3</sup>-600 °C.

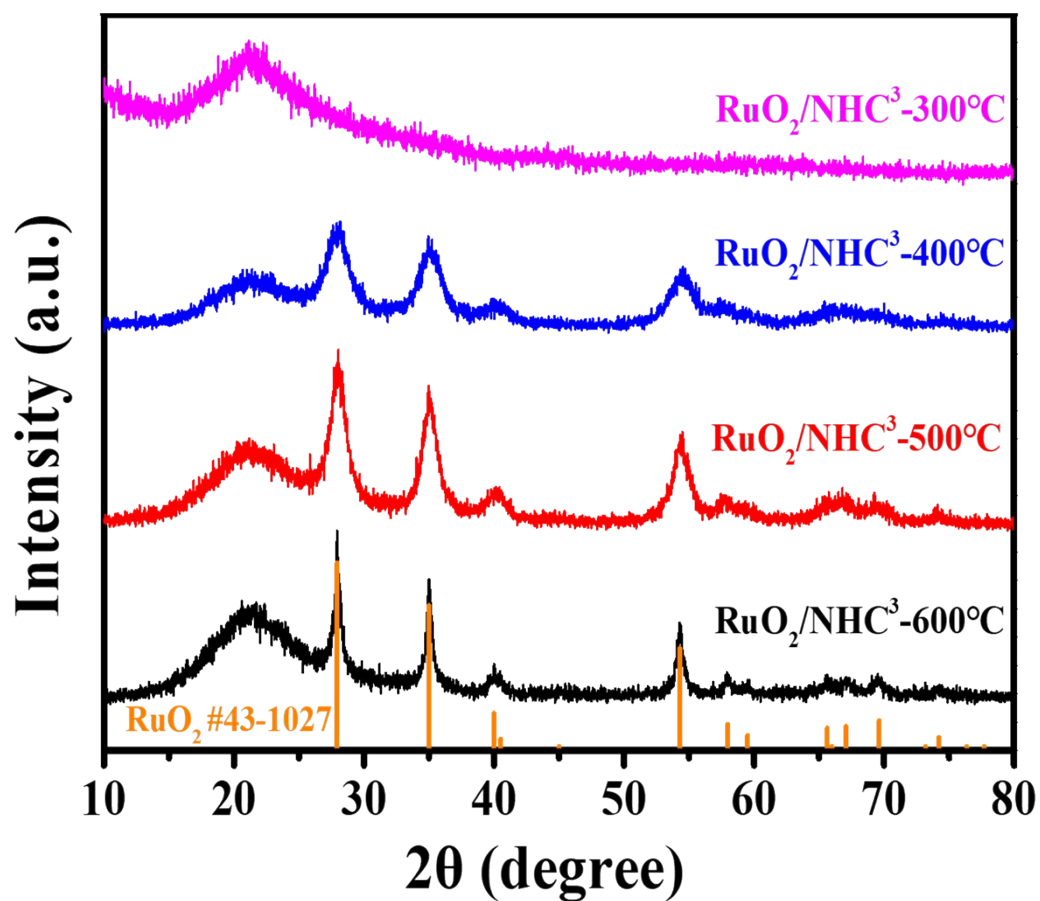

Fig S15. XRD pattern of RuO<sub>2</sub>/NHC<sup>3</sup>-300 °C, RuO<sub>2</sub>/NHC<sup>3</sup>-400 °C, RuO<sub>2</sub>/NHC<sup>3</sup>-500 °C, RuO<sub>2</sub>/NHC<sup>3</sup>-600 °C.



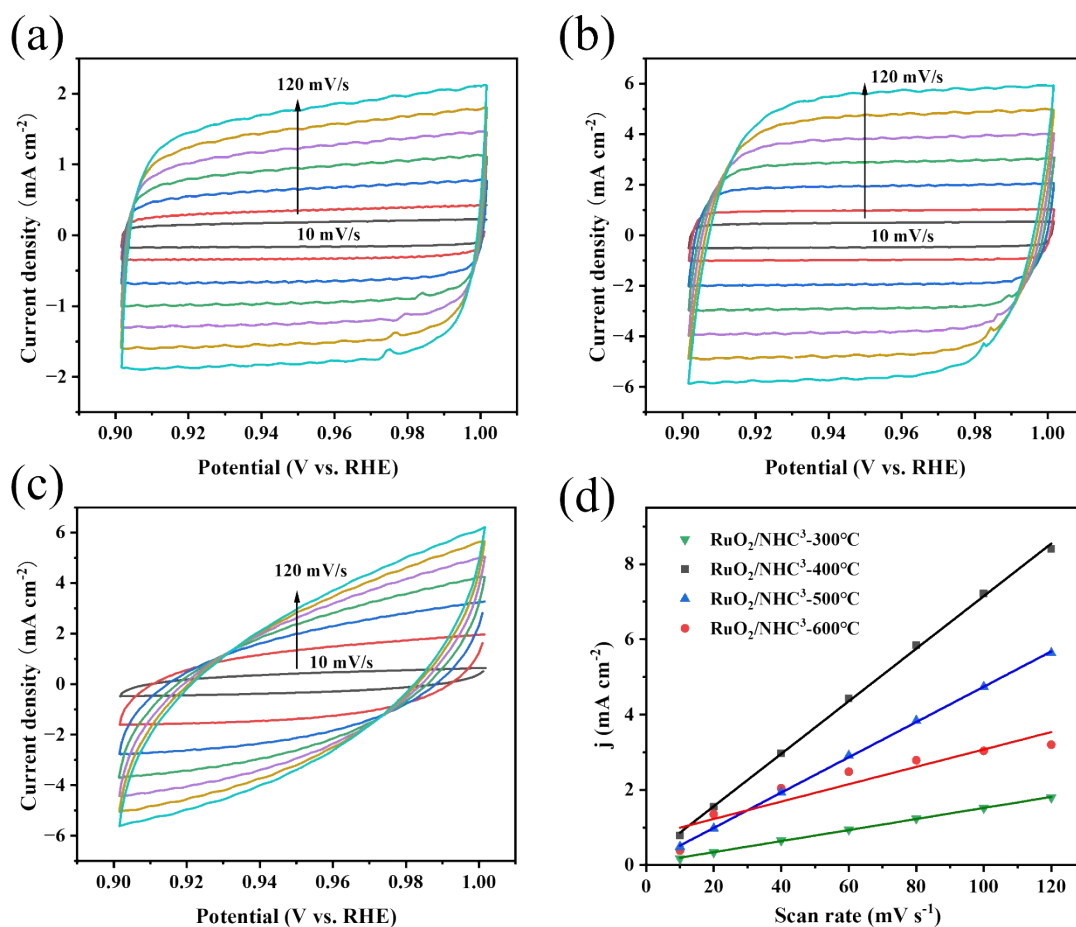

Fig S16. CV curves of a) RuO<sub>2</sub>/NHC<sup>3</sup>-300 °C, b) RuO<sub>2</sub>/NHC<sup>3</sup>-500 °C, c) RuO<sub>2</sub>/NHC<sup>3</sup>-600 °C and d) Current density as a function of the scan rate for different samples for OER.

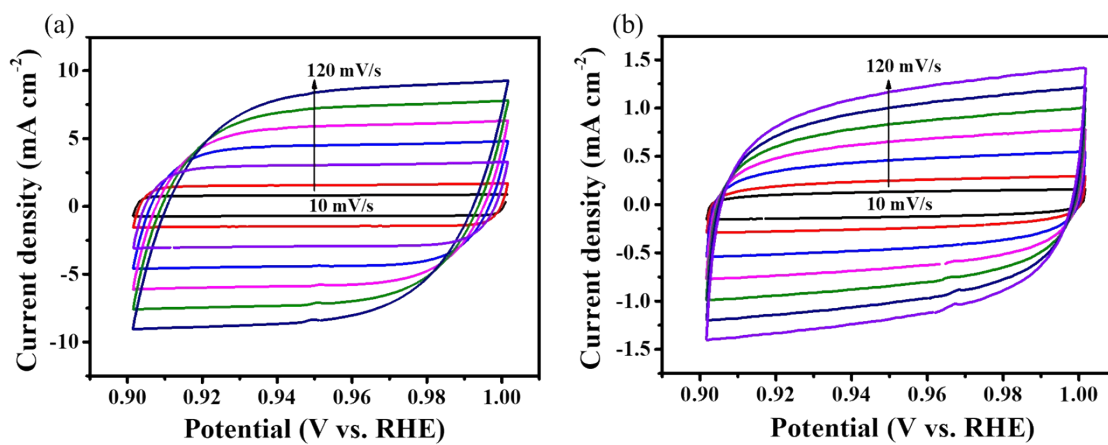

Fig S17. CVs measured at different scan rates from 10 to 120 mV/s of (a)  $\text{RuO}_2/\text{NHC}^3$  and (b)  $\text{RuO}_2$ .

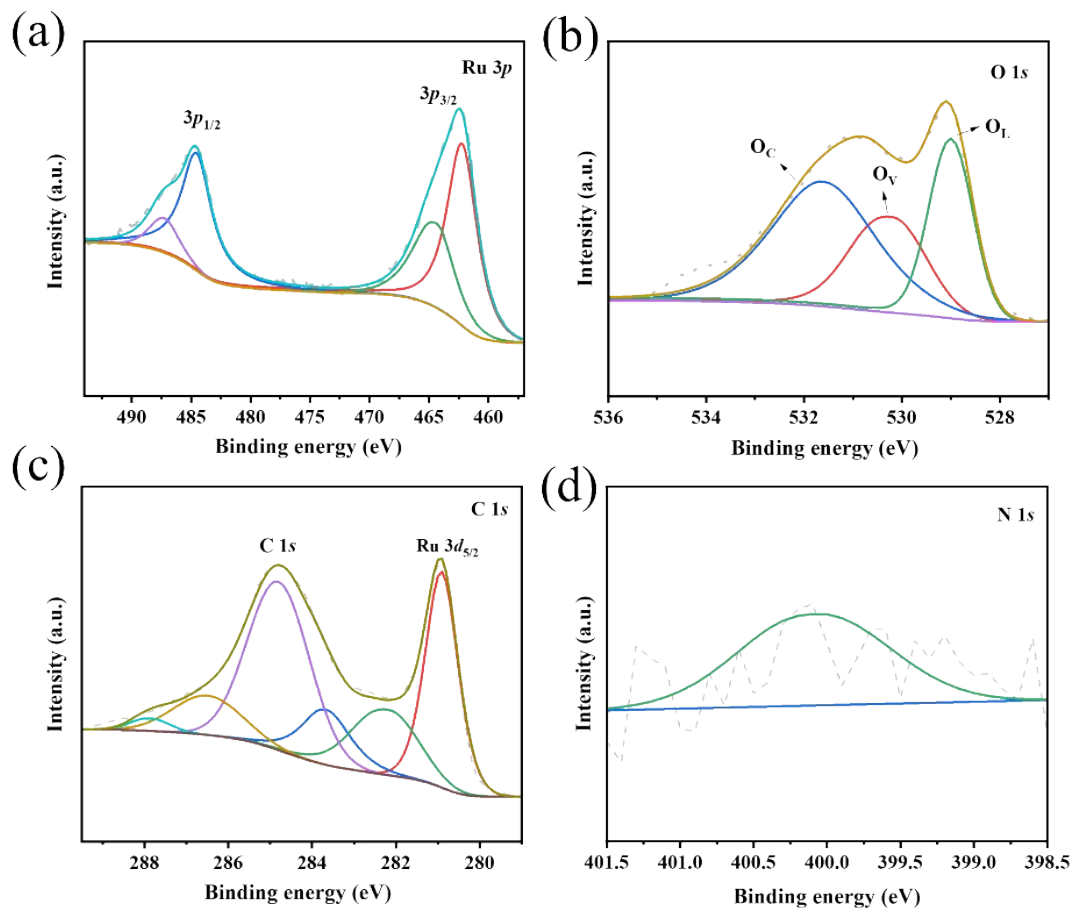

Fig S18. a) Ru 3p, b) O 1s, c) C1s and d) N 1s XPS spectra of RuO<sub>2</sub>/NHC<sup>3</sup> after long time chronopotentiometry test.

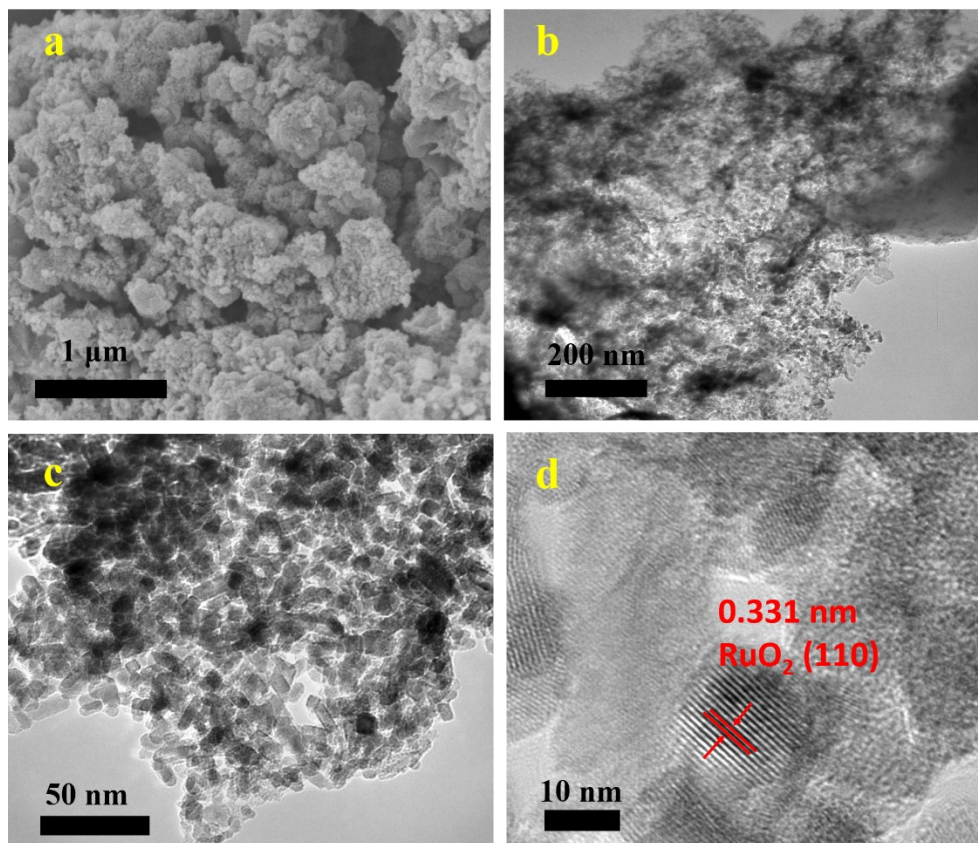

Fig S19. a) SEM, b-c) TEM image and d) HR-TEM image of RuO<sub>2</sub>/NHC<sup>3</sup> after long time chronopotentiometry test.

Table S1. BET surface area and overpotential at 10 mA/cm<sup>2</sup> of various samples.

| Sample                 | S <sub>BET</sub><br>(m <sup>2</sup> /g) | Sample                                 | η <sub>10</sub> (mV) |
|------------------------|-----------------------------------------|----------------------------------------|----------------------|
| NPG                    | 4                                       | RuO <sub>2</sub> /NPG                  | NA                   |
| NHC <sup>0</sup>       | 468                                     | RuO <sub>2</sub> /NHC <sup>0</sup>     | 344                  |
| NHC <sup>1</sup>       | 1563                                    | RuO <sub>2</sub> /NHC <sup>1</sup>     | 202                  |
| NHC <sup>2</sup>       | 1894                                    | RuO <sub>2</sub> /NHC <sup>2</sup>     | 185                  |
| <b>NHC<sup>3</sup></b> | <b>2107</b>                             | <b>RuO<sub>2</sub>/NHC<sup>3</sup></b> | <b>186</b>           |
| NHC <sup>4</sup>       | 2998                                    | RuO <sub>2</sub> /NHC <sup>4</sup>     | 215                  |

Table S2. The  $C_{dl}$  and ECSA of RuO<sub>2</sub>/NHC<sup>0</sup>, RuO<sub>2</sub>/NHC<sup>1</sup>, RuO<sub>2</sub>/NHC<sup>2</sup>, RuO<sub>2</sub>/NHC<sup>3</sup> and RuO<sub>2</sub>/NHC<sup>4</sup> for OER.

| Sample                                 | $C_{dl}$ (mF/cm <sup>2</sup> ) | ECSA (cm <sup>2</sup> /mg) |
|----------------------------------------|--------------------------------|----------------------------|
| RuO <sub>2</sub> /NHC <sup>0</sup>     | 46.3                           | 1157.5                     |
| RuO <sub>2</sub> /NHC <sup>1</sup>     | 60.3                           | 1507.5                     |
| RuO <sub>2</sub> /NHC <sup>2</sup>     | 62.6                           | 1565                       |
| <b>RuO<sub>2</sub>/NHC<sup>3</sup></b> | <b>69.8</b>                    | <b>1745</b>                |
| RuO <sub>2</sub> /NHC <sup>4</sup>     | 55.3                           | 1382.5                     |

Table S3. The  $C_{dl}$  and ECSA of RuO<sub>2</sub>/NHC<sup>3</sup>-300 °C, RuO<sub>2</sub>/NHC<sup>3</sup>-400 °C, RuO<sub>2</sub>/NHC<sup>3</sup>-500 °C and RuO<sub>2</sub>/NHC<sup>3</sup>-600 °C for OER.

| Sample                                        | $C_{dl}$ (mF/cm <sup>2</sup> ) | ECSA (cm <sup>2</sup> /mg) |
|-----------------------------------------------|--------------------------------|----------------------------|
| RuO <sub>2</sub> /NHC <sup>3</sup> -300 °C    | 14.7                           | 367.5                      |
| <b>RuO<sub>2</sub>/NHC<sup>3</sup>-400 °C</b> | <b>69.8</b>                    | <b>1745</b>                |
| RuO <sub>2</sub> /NHC <sup>3</sup> -500 °C    | 46.9                           | 1172.5                     |
| RuO <sub>2</sub> /NHC <sup>3</sup> -600 °C    | 23.1                           | 577.5                      |

Table S4. Parameters of  $R_s$  and  $R_{ct}$  acquired through fitting EIS spectra.

| electrocatalyst                        | $R_s$ (ohm) | $R_{ct}$ (ohm) |
|----------------------------------------|-------------|----------------|
| <b>RuO<sub>2</sub>/NHC<sup>3</sup></b> | <b>1.60</b> | <b>0.4189</b>  |
| RuO <sub>2</sub>                       | 1.898       | 5.04           |
| NHC <sup>3</sup>                       | 19.98       | 1.716          |



Table S5. Comparison of the Ru-based electrocatalysts reported in representative literature under acidic electrolyte.

| Catalysts                                              | Electrolyte                              | $\eta(\text{mV})$ at 10 $\text{mA}/\text{cm}^2$ | Stability                                                                                             | Ref              |
|--------------------------------------------------------|------------------------------------------|-------------------------------------------------|-------------------------------------------------------------------------------------------------------|------------------|
| <b>RuO<sub>2</sub>/NHC<sup>3</sup></b>                 | <b>0.5 M H<sub>2</sub>SO<sub>4</sub></b> | <b>186</b>                                      | <b>27 h at 10 mA/cm<sup>2</sup></b>                                                                   | <b>This work</b> |
| RuCo@NG/N-GNs                                          | 0.5 M H <sub>2</sub> SO <sub>4</sub>     | 209                                             | 10 h at 10 mA/cm <sup>2</sup>                                                                         | 1                |
| 1D-RuO <sub>2</sub> -CN <sub>x</sub>                   | 0.5 M H <sub>2</sub> SO <sub>4</sub>     | 250                                             | lost ~32% current after 55 h of scan                                                                  | 2                |
| IrO <sub>2</sub> -BN-rGO                               | 0.5 M H <sub>2</sub> SO <sub>4</sub>     | 300                                             | 45 h at 10 mA/cm <sup>2</sup> and 5 mA/cm <sup>2</sup>                                                | 3                |
| NaRuO <sub>2</sub> nanosheets                          | 0.1 M HClO <sub>4</sub>                  | 255                                             | 6 h at 1 mA/cm <sup>2</sup>                                                                           | 4                |
| Cu-doped RuO <sub>2</sub>                              | 0.5 M H <sub>2</sub> SO <sub>4</sub>     | 188                                             | 8 h at 10 mA/cm <sup>2</sup>                                                                          | 5                |
| a/c RuO <sub>2</sub>                                   | 0.1 M HClO <sub>4</sub>                  | 205                                             | 60 h at 10 mA/cm <sup>2</sup>                                                                         | 6                |
| Cr <sub>0.6</sub> Ru <sub>0.4</sub> O <sub>2</sub>     | 0.5 M H <sub>2</sub> SO <sub>4</sub>     | 178                                             | 10 h at 10 mA/cm <sup>2</sup>                                                                         | 7                |
| RuO <sub>2</sub> /(Co, Mn) <sub>3</sub> O <sub>4</sub> | 0.5 M H <sub>2</sub> SO <sub>4</sub>     | 270                                             | 24 h at 10 mA/cm <sup>2</sup>                                                                         | 8                |
| Sn-RuO <sub>2</sub> @NPC                               | 0.5 M H <sub>2</sub> SO <sub>4</sub>     | 178                                             | 150 h at 10 mA/cm <sup>2</sup>                                                                        | 9                |
| COOH-MWNTs                                             | 0.5 M H <sub>2</sub> SO <sub>4</sub>     | 265                                             | 10 h at 10 mA/cm <sup>2</sup>                                                                         | 10               |
| 2D D-RuO <sub>2</sub> /G                               | 0.5 M H <sub>2</sub> SO <sub>4</sub>     | 169                                             | 2000 cycles                                                                                           | 11               |
| RuB <sub>2</sub>                                       | 0.5 M H <sub>2</sub> SO <sub>4</sub>     | 223                                             | 10 h at 10 mA/cm <sup>2</sup>                                                                         | 12               |
| Ru@IrO <sub>x</sub>                                    | 0.05 M H <sub>2</sub> SO <sub>4</sub>    | 282                                             | 24h at 1.55 V                                                                                         | 13               |
| RuMn NSBs                                              | 0.5 M H <sub>2</sub> SO <sub>4</sub>     | 196                                             | 125 h at 10 mA/cm <sup>2</sup> for RuMn NSBs-250  RuMn NSBs-300                                       | 14               |
| 3D Ru/RuO <sub>2</sub> @N-rGO                          | 0.5 M H <sub>2</sub> SO <sub>4</sub>     | 234                                             | 10 h at 10 mA/cm <sup>2</sup> in 1.0 M KOH for Ru/RuO <sub>2</sub> @N-rGO  Ru/RuO <sub>2</sub> @N-rGO | 15               |
| Zn-doped RuO <sub>2</sub>                              | 0.5 M H <sub>2</sub> SO <sub>4</sub>     | 206                                             | 30 h at 10 mA/cm <sup>2</sup>                                                                         | 16               |

## Reference

- 1 M. Zhang, H. Li, J. Chen, L. Yi, P. Shao, C.-Y. Xu and Z. Wen, *Chem. Eng. J.*, 2021, **422**, 13007.
- 2 T. Bhowmik, M. K. Kundu and S. Barman, *ACS Appl. Mater. Interfaces*, 2016, **8**, 28678-28688.
- 3 P. Joshi, R. Yadav, M. Hara, T. Inoue, Y. Motoyama and M. Yoshimura, *J. Mater. Chem. A*, 2021, **9**, 9066-9080.
- 4 S. Laha, Y. Lee, F. Podjaski, D. Weber, V. Duppel, L. M. Schoop, F. Pielhofer, C. Scheurer, K. Müller, U. Starke, K. Reuter and B. V. Lotsch, *Adv. Energy Mater.*, 2019, **9**, 1803795.
- 5 J. Su, R. Ge, K. Jiang, Y. Dong, F. Hao, Z. Tian, G. Chen and L. Chen, *Adv. Mater.*, 2018, **30**, 1801351.
- 6 L. Zhang, H. Jang, H. Liu, M. G. Kim, D. Yang, S. Liu, X. Liu and J. Cho, *Angew. Chem. Int. Ed. Engl.*, 2021, **60**, 18821-18829.
- 7 Y. Lin, Z. Tian, L. Zhang, J. Ma, Z. Jiang, B. J. Deibert, R. Ge and L. Chen, *Nat. Commun*, 2019, **10**, 162.
- 8 S. Niu, X.-P. Kong, S. Li, Y. Zhang, J. Wu, W. Zhao and P. Xu, *Appl. Catal. B*, 2021, **297**, 120442.
- 9 L. Qiu, G. Zheng, Y. He, L. Lei and X. Zhang, *Chem. Eng. J.*, 2021, **409**, 128155.
- 10 X. Zhang, W. Zhang, J. Dai, M. Sun, J. Zhao, L. Ji, L. Chen, F. Zeng, F. Yang, B. Huang and L. Dai, *InfoMat*, 2021, **4**, 12273.
- 11 Y. Li, Y. Wang, J. Lu, B. Yang, X. San and Z.-S. Wu, *Nano Energy*, 2020, **78**, 105185.
- 12 D. Chen, T. Liu, P. Wang, J. Zhao, C. Zhang, R. Cheng, W. Li, P. Ji, Z. Pu and S. Mu, *ACS Energy Lett.*, 2020, **5**, 2909-2915.
- 13 J. Shan, C. Guo, Y. Zhu, S. Chen, L. Song, M. Jaroniec, Y. Zheng and S.-Z. Qiao, *Chem.*, 2019, **5**, 445-459.
- 14 L. Li, L. Bu, B. Huang, P. Wang, C. Shen, S. Bai, T. S. Chan, Q. Shao, Z. Hu and X. Huang, *Adv. Mater*, 2021, **33**, 2105308.
- 15 X. Gao, J. Chen, X. Sun, B. Wu, B. Li, Z. Ning, J. Li and N. Wang, *ACS Appl. Nano Mater.*, 2020, **3**, 12269-12277.
- 16 H. Zhang, B. Wu, J. Su, K. Zhao and L. Chen, *ChemNanoMat*, 2021, **7**, 117-121.
